# Supplementary material for: Strenuous Physical Training, Physical Fitness, Body Composition and Bacteroides to Prevotella Ratio in the Gut of Elderly Athletes
Source: PubMed Central journal article supplement (PMC8257935; doi:10.3389/fphys.2021.670989), 2021-06-22

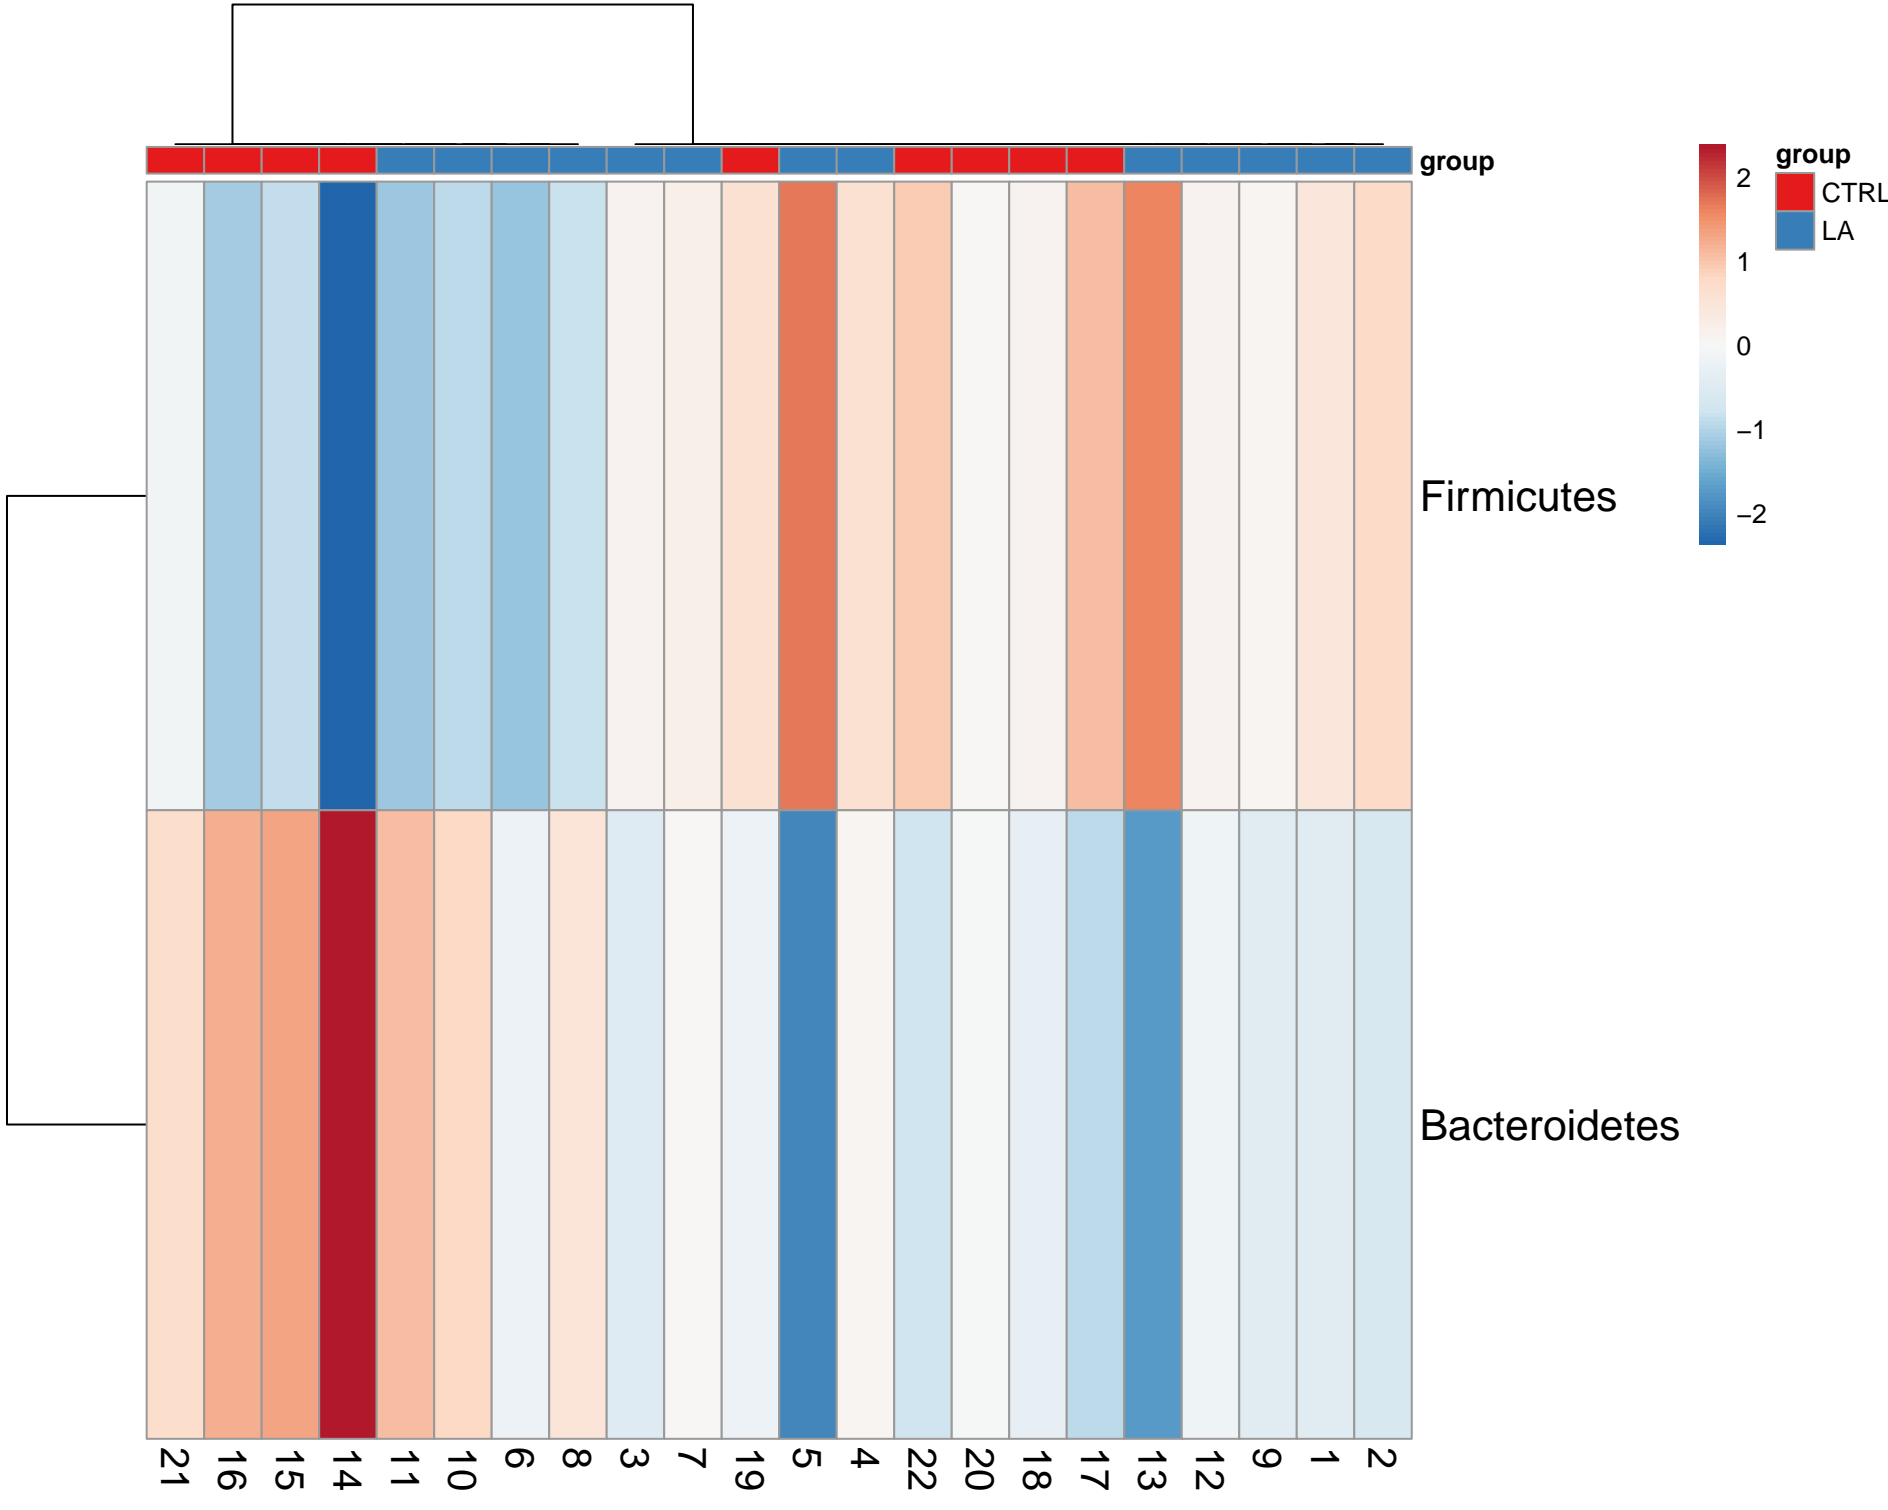

Supplement: Image_1.pdf [file Image_1.pdf]
